# Supplementary material for: Heterogeneous multi-compartmental DNA hydrogel particles preparedviamicrofluidic assembly for lymphocyte-inspired precision medicine
Source: Royal Society of Chemistry journal article supplement (doi:10.1039/d1nr06594g), 2021-01-01
Supplement: d1nr06594g2.pdf [file d1nr06594g2.pdf]

## Supporting Information

### **Heterogeneous multi-compartmental DNA hydrogel particles through microfluidic assembly for lymphocyte inspired precision medicine**

Sophie Wan Mei Lian<sup>1,2+</sup>, Song Guo<sup>1,2+</sup>, Kewei Ren<sup>1</sup>, Ying Xu<sup>3</sup>, John S. Ho<sup>1,2</sup> and Chia-Hung Chen<sup>3\*</sup>

1. Department of Biomedical Engineering, National University of Singapore  
4 Engineering Drive 3, #04-08, Singapore 117583

2. Institute for Health Innovation and Technology (iHealthtech)  
MD6, 14 Medical Drive #14-01 Singapore 117599

3. Department of Biomedical Engineering, City University of Hong Kong,  
83 Tat Chee Avenue, Kowloon, Hong Kong, China.

<sup>+</sup>Equal contributions

\*E-mail: [chiachen@cityu.edu.hk](mailto:chiachen@cityu.edu.hk)

**Table S1. Sequences of the DNA and RNA oligonucleotides.**

Acryd: Acrylic phosphoramidite added to oligonucleotides as a 5'-modification

ROXN: ROXN fluorophore (attached to a guanine residue)

BHQ-2: Black Hole Quencher®-2 (attached to a cytosine residue)

CholTEG: CholTEG (attached to a thymine residue)

TAMRA: TAMRA fluorophore (attached to a guanine residue)

| <b>Name of oligonucleotide</b>           | <b>Sequence</b>                                                   |
|------------------------------------------|-------------------------------------------------------------------|
| Sequence 1<br>b-a                        | 5'-5Acryd/TTT TTG ATC TCA TCA ACA TCA<br>GTC TGA TAA GCT A-3'     |
| Sequence 2<br>b'-c                       | 5'-/56-ROXN/rGrGrA rGrUrA rCrCrC rUrGrA<br>rUrGrA rGrArU rCTT-3'  |
| Sequence 3<br>a'-c'                      | 5'-TCA GAC TGA TGT GGG TAC TCC/3BHQ_2/-<br>3                      |
| Sequence 3'<br>a'-c'                     | 5'-TCA GAC TGA TGT GGG TAC TCC-3'                                 |
| Sequence 4<br>d'-b'                      | 5'-TAG CTT ATC AGA CTG ATG TTG ATG-3'                             |
| Sequence 5<br>b-c'                       | 5'-rGrArU rCrUrC rArUrC rArGrG rGrUrA rCrUrC<br>rCTT/3CholTEG/-3' |
| Sequence 5'<br>b-c'                      | 5'-/TAMRA/rGrArU rCrUrC rArUrC rArGrG<br>rGrUrA rCrUrC rCTT/-3'   |
| Sequence 6<br>c-d                        | 5'-/5Acryd/TTT TTG GAG TAC CCA CAT CAG<br>TCT GAT AAG C-3'        |
| Synthetic<br>miRNA-21<br>target<br>a'-b' | 5'-rUrArG rCrUrU rArUrC rArGrA rCrUrG rArUrG<br>rUrUrG rA-3'      |

**Table S2:** The radius and volume of core-shell particles fabricated are summarized here. The core and shell. The core-shell volume ratio was altered from 1:1 to 1:4 by controlling the flow rates.

| <b>R:r</b> | <b>V<sub>core</sub>:V<sub>shell</sub></b> | <b>C<sub>D1</sub>:C<sub>D2</sub></b> |
|------------|-------------------------------------------|--------------------------------------|
| √2:1       | 1:1                                       | 1:1                                  |
| √3:1       | 1:2                                       | 1:0.5                                |
| √4:1       | 1:3                                       | 1:0.33                               |
| √5:1       | 1:4                                       | 1:0.25                               |

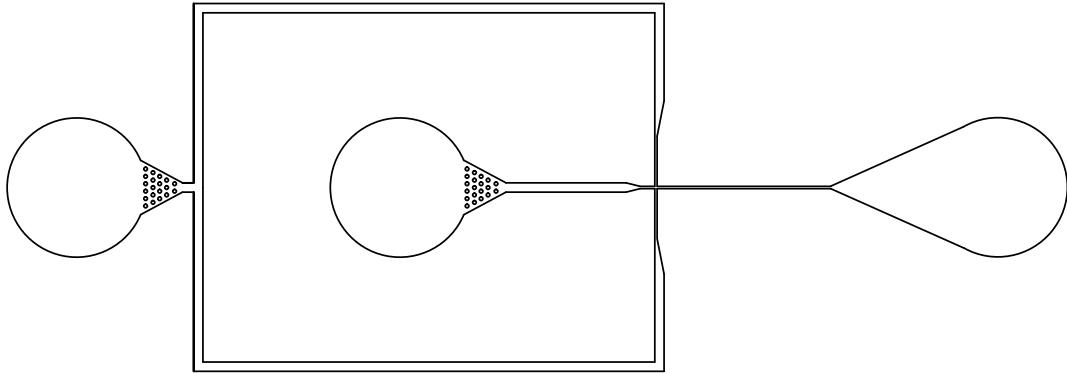

**Figure S1.** Microfluidic droplet generator to form monodispersed water-in-oil with pre-gel monomers as templates to fabricate the hydrogel particles as the cores in the core-shell hydrogel particles. The dimension of the channel is in the following (W: 25  $\mu\text{m}$ , H: 30  $\mu\text{m}$ ).

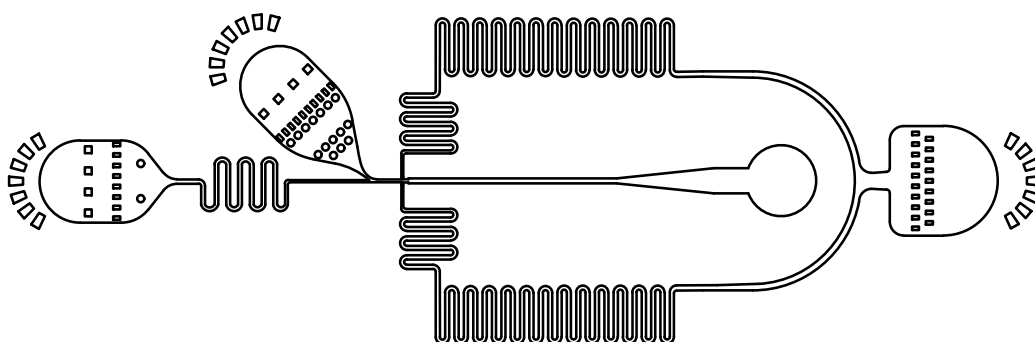

**Figure S2.** Microfluidic device to produce the pre-gel droplets for core PEG hydrogel particle encapsulation forming core-shell PEG hydrogel particles via polymerization. The DNAs can be compartmentalized into the core and shell accordingly for logical control of siRNA releasing. The channel diameter is indicated here (W: 30  $\mu\text{m}$ , H: 30  $\mu\text{m}$ ).
